# Supplementary material for: Authorization of Animal Experiments Is Based on Confidence Rather than Evidence of Scientific Rigor
Source: PubMed Central journal article supplement (PMC5135031; doi:10.1371/journal.pbio.2000598), 2016-12-02
Supplement: pbio.2000598.s005.pdf [file pbio.2000598.s005.pdf]

# Checklist - Evaluation of the Scientific Validity of Animal Experiments in Switzerland

National / Cantonal No.:

Assessor:

Date:

Time spent on the evaluation:

Language:

Species:

Type of experiment:

Experimental

in vitro

Monitoring

other

No. of experiments:

## Questions about internal validity

NA: not applicable

?: ambiguous/incomprehensible

### 1 Allocation concealment:

1.1 Induction of disease or animal model

|    |     |    |    |
|----|-----|----|----|
| NA | Yes | No | ?? |
|----|-----|----|----|

### 2 Blinding:

2.1 Conduct of study

|    |     |    |    |
|----|-----|----|----|
| NA | Yes | No | ?? |
|----|-----|----|----|

2.2 Outcome assessment

|    |     |    |    |
|----|-----|----|----|
| NA | Yes | No | ?? |
|----|-----|----|----|

### 3 Randomization:

3.1 Treatment allocation

|    |     |    |    |
|----|-----|----|----|
| NA | Yes | No | ?? |
|----|-----|----|----|

3.2 Conduct of study

|    |     |    |    |
|----|-----|----|----|
| NA | Yes | No | ?? |
|----|-----|----|----|

### 4 Sample size:

4.1 Formally calculated (power analysis) (54.4)

|    |     |    |    |
|----|-----|----|----|
| NA | Yes | No | ?? |
|----|-----|----|----|

4.2 Based on some reference

|    |     |    |    |
|----|-----|----|----|
| NA | Yes | No | ?? |
|----|-----|----|----|

### 5 Eligibility and drop-outs:

5.1 Are inclusion or exclusion criteria of animals specified ?

|    |     |    |    |
|----|-----|----|----|
| NA | Yes | No | ?? |
|----|-----|----|----|

5.2 Are termination criteria specified? (56.3)

|    |     |    |    |
|----|-----|----|----|
| NA | Yes | No | ?? |
|----|-----|----|----|

### 6 Primary outcome variable:

6.1 Is the primary outcome variable specified?

|    |     |    |    |
|----|-----|----|----|
| NA | Yes | No | ?? |
|----|-----|----|----|

### 7 Statistical analysis:

7.1 Is the method of statistical analysis explicitly specified? (54.4, 55)

|    |     |    |    |
|----|-----|----|----|
| NA | Yes | No | ?? |
|----|-----|----|----|

7.2 Is the general statistical method specified? (54.4, 55)

|    |     |    |    |
|----|-----|----|----|
| NA | Yes | No | ?? |
|----|-----|----|----|

## Questions about the accuracy of Form A

### 8 Experimental methods:

8.1 Are any references or pilot studies mentioned concerning the methods used?

|    |     |    |    |
|----|-----|----|----|
| NA | Yes | No | ?? |
|----|-----|----|----|

### 9 Individual identification:

9.1 Is the marking or identification method described? (52)

|    |     |    |    |
|----|-----|----|----|
| NA | Yes | No | ?? |
|----|-----|----|----|

### 10 Animals:

10.1 Does total no. of animals (table 33) match sum of animals of all groups? (54.3)

|    |     |    |    |
|----|-----|----|----|
| NA | Yes | No | ?? |
|----|-----|----|----|

10.2 Is the no. of groups (incl. control) correctly stated? (54.3)

|    |     |    |    |
|----|-----|----|----|
| NA | Yes | No | ?? |
|----|-----|----|----|

10.3 Is the no. of animals per groups correctly stated? (54.3)

|    |     |    |    |
|----|-----|----|----|
| NA | Yes | No | ?? |
|----|-----|----|----|

### 11 Animal welfare:

11.1 Are score sheets or descriptions of assessed parameters available? (56.2)

|    |     |    |    |
|----|-----|----|----|
| NA | Yes | No | ?? |
|----|-----|----|----|

### 12 Severity:

12.1 Are numbers or percentage of animals given per degree of severity? (56.4)

|    |     |    |    |
|----|-----|----|----|
| NA | Yes | No | ?? |
|----|-----|----|----|

### 13 End of experiment:

13.1 Is the fate of the animals at the end of the experiment stated (e.g. further use, killing method, etc.)? (58)

|    |     |    |    |
|----|-----|----|----|
| NA | Yes | No | ?? |
|----|-----|----|----|

Comments:
